# Supplementary material
Source: publisher figshare collection journal article supplement (https://scielo.figshare.com/articles/dataset/_/11839965)
Supplement: Supplementary file 1 [file Table_1.xls]

## Sheet: Table_1
<b><strong>Outcome of the <em>Nursing Outcomes Classification</em> - Anxiety self-control (1402)</strong></b>
<strong>Indicators</strong>	<strong>Magnitude of the operational definition in the Likert scale</strong>
<strong>Monitors intensity of anxiety</strong><br><strong>Conceptual definition:</strong> Measures the degree of distress experienced at the time of exposure to the feared situation, varying from "no anxiety" to "extreme anxiety."	<strong>1.</strong> Never<br><strong>2.</strong> Rarely<br><strong>3.</strong> Several times a month<br><strong>4.</strong> Several times a week<br><strong>5.</strong> Daily
<strong>Uses effective coping strategies</strong><br><strong>Conceptual definition:</strong> Plans in advance how to behave in risky situations, considering what should be done in terms of exposure and prevention of response. For example: attempt getting distracted during risky situations, with other thoughts or practical activities, chatting with yourself, or using reminders.	<strong>1.</strong> Never use strategies<br><strong>2.</strong> Rarely use a strategy<br><strong>3.</strong> Monthly use at least one strategy<br><strong>4.</strong> Weekly use at least one strategy<br><strong>5.</strong> Daily use at least one strategy
<strong>Maintains social relationships</strong><br><strong>Conceptual definition:</strong> Manages to maintain a good relationship, with a certain frequency, with people who are part of your daily life, whether in a working group, friends, or family members, playing your respective role in certain situations, despite the symptoms of OCD.	<strong>1.</strong> Never relate to close people<br><strong>2.</strong> Relate to people only when necessary<br><strong>3.</strong> Relate to people maintaining a certain distance<br><strong>4.</strong> Relate to people, but make efforts to do so<br><strong>5.</strong> Usually relate to people
<strong>Monitor behavioral manifestations of anxiety</strong><br><strong>Conceptual definition:</strong> Can perceive and distinguish what are behavioral and physical manifestations of anxiety from those that would be perceived manifestations/sensations and triggered by normal situations. Monitoring related to the level of disease insight.	<strong>1.</strong> Never monitor demonstrations<br><strong>2.</strong> Rarely monitor demonstrations<br><strong>3.</strong> Monitor demonstrations several times a month<br><strong>4.</strong> Monitor demonstrations several times a week<br><strong>5.</strong> Usually monitor demonstrations
<strong>Outcome of the <em>Nursing Outcomes Classification</em> - Fear level (1210)</strong>
<strong>Indicators</strong>	<strong>Magnitude of the operational definition</strong>
<strong>Distress</strong><br><strong>Conceptual definition:</strong> Feeling of general, physical, and psychic malaise, which usually accompanies anxiety, especially after exposure exercises and prevention of responses.	<strong>1.</strong> Feel distressed every day<br><strong>2.</strong> Feel distressed several times a week<br><strong>3.</strong> Feel distressed several times a month<br><strong>4.</strong> Rarely feel distressed<br><strong>5.</strong> Never feel distressed
<strong>Restlessness</strong><br><strong>Conceptual definition:</strong> Psychomotor agitation due to peaks of anxiety, which may result in increased compulsive symptoms and invasive thoughts.	<strong>1.</strong> Presents restlessness every day<br><strong>2.</strong> Presents restlessness several times a week<br><strong>3.</strong> Presents restlessness several times a month<br><strong>4.</strong> Rarely presents restlessness<br><strong>5.</strong> Never presents restlessness
<strong>Difficulty concentrating</strong><br><strong>Conceptual definition:</strong> Presents difficulty to concentrate on tasks/activities due to invasive thoughts, fears, and/or unfounded concerns.	<strong>1.</strong> Never concentrates for the entire period of activity<br><strong>2.</strong> Rarely concentrates for the entire period of activity<br><strong>3.</strong> Concentrates for the entire period of activity several times a month<br><strong>4.</strong> Concentrates for the entire period of activity several times a week<br><strong>5.</strong> Usually concentrates for the entire period …
<strong>Difficulty problem solving</strong><br><strong>Conceptual definition:</strong> Excessive difficulty in solving everyday problems, due to fears arising from invasive thoughts and slowness by performing compulsive rituals/behaviors.	<strong>1.</strong> Never succeeds in solving problems<br><strong>2.</strong> Rarely succeeds in solving problems<br><strong>3.</strong> Succeeds in solving problems several times a month<br><strong>4.</strong> Succeeds in solving problems several times a week<br><strong>5.</strong> Succeeds in solving problems whenever they arise
<strong>Exaggerated concern about life events</strong><br><strong>Conceptual definition:</strong> Worries exaggeratedly about situations of everyday life that may bring unfounded risks, due to fears and invasive and obsessive thoughts. For example: worries about knowing whether you locked the door or not.	<strong>1.</strong> Usually worries<br><strong>2.</strong> Worries several times a week<br><strong>3.</strong> Worries several times a month<br><strong>4.</strong> Rarely worries<br><strong>5.</strong> Never worries
<strong>Avoidance behavior</strong><br><strong>Conceptual definition:</strong> Avoids people, situations, places, and objects because of the fear that major disasters may occur due to obsessive thoughts.	<strong>1.</strong> Never exposes to risky situations<br><strong>2.</strong> Rarely exposes to risky situations<br><strong>3.</strong> Exposes to risky situations several times a month<br><strong>4.</strong> Exposes to risky situations several times a week<br><strong>5.</strong> Usually exposes to risky situations
<strong>Outcome of the <em>Nursing Outcomes Classification</em> - Anxiety level (1211)</strong>
<strong>Indicators</strong>	<strong>Magnitude of the operational definition</strong>
<strong>Indecisiveness</strong><br><strong>Conceptual definition:</strong> Manifest indecisiveness about basic choices of daily life due to the lack of confidence in yourself, because of unfounded fears.	<strong>1.</strong> Is usually undecided<br><strong>2.</strong> Is undecided several times a week<br><strong>3.</strong> Is undecided several times a month<br><strong>4.</strong> Is rarely undecided<br><strong>5.</strong> Is never undecided
<strong>Sleep disturbance</strong><br><strong>Conceptual definition:</strong> Suffer from sleep disorders, being characterized both by excess and lack of sleep.	<strong>1.</strong> Usually suffer from sleep disturbances<br><strong>2.</strong> Suffer from sleep disturbances several times a week<br><strong>3.</strong> Suffer from sleep disturbances several times a month<br><strong>4.</strong> Rarely suffer from sleep disturbances<br><strong>5.</strong> Never suffer from sleep disturbances
<strong>Decreased productivity</strong><br><strong>Conceptual definition:</strong> Stops doing daily or exceptional activities due to rituals/obsessions/compulsions/fears, leading to the loss of several hours of the day because of the slowness to perform the activities and consecutive interruptions.	<strong>1.</strong> Never succeeds in performing all activities of the day<br><strong>2.</strong> Rarely succeeds in performing all activities of the day<br><strong>3.</strong> Succeeds in performing the activities of the day several times a month<br><strong>4.</strong> Succeeds in performing the activities of the day several times a week<br><strong>5.</strong> Usually succeeds in performing all …
<strong>Outcome of the <em>Nursing Outcomes Classification</em> - Personal time management (1635)</strong>
<strong>Indicators</strong>	<strong>Magnitude of the operational definition</strong>
<strong>Sets time for completion of commitments</strong><br><strong>Conceptual definition:</strong> Establish a precise time to conclude daily or exceptional tasks/commitments, aiming at not being interrupted by rituals/compulsions.	<strong>1.</strong> Never establishes time to conclude taks/commitments<br><strong>2.</strong> Rarely<br><strong>3.</strong> Several times a month<br><strong>4.</strong> Several times a week<br><strong>5.</strong> Whenever concludes tasks/appointments
<strong>Plan activities by the week</strong><br><strong>Conceptual definition:</strong> Succeeds in making schedule of commitments/activities for the following week and perform it, without interruptions or changes of time due to rituals/obsessions/compulsions.	<strong>1.</strong> Never succeeds in planning activities for the next week<br><strong>2.</strong> Rarely succeeds in planning activities for the next week<br><strong>3.</strong> Succeeds in planning activities for the next week one week a month<br><strong>4.</strong> Succeeds in planning activities for the next week almost every weeks a month<br><strong>5.</strong> Usually succeeds in planning a…
<strong>Minimizes interruptions</strong><br><strong>Conceptual definition:</strong> Decrease the number of ritual-related interruptions (e.g., checking, repeating) during daily or exceptional tasks.	<strong>1.</strong> Usually interrupts tasks<br><strong>2.</strong> Interrupts tasks several times a week<br><strong>3.</strong> Interrupts tasks several times a month<br><strong>4.</strong> Rarely interrupts tasks<br><strong>5.</strong> Never interrupts tasks
<strong>Uses strategies to reduce anxiety</strong><br><strong>Conceptual definition:</strong> Uses personal or learned strategies aimed at reducing anxiety in moments of crisis, without confusing strategies with "masked" rituals. Examples of strategies: The STOP technique, seeking to be distracted to cut the flow of invasive thoughts, doing another activity etc.	<strong>1.</strong> Never uses strategies<br><strong>2.</strong> Rarely uses strategies<br><strong>3.</strong> Uses strategies several times a month<br><strong>4.</strong> Uses strategies several times a week<br><strong>5.</strong> Usually uses strategies
