# Supplementary material
Source: publisher figshare collection journal article supplement (https://scielo.figshare.com/articles/dataset/_/11839965)
Supplement: Supplementary file 2 [file Table_2.xls]

## Sheet: Table_2
<b>Outcomes and indicators</b>	<b>Mean of the indicators in the assessments (standard deviation)</b>			<b><em>p</em><br>value</b>
	1<sup>st</sup> evaluation<br>(n = 6)	2<sup>nd</sup> evaluation<br>(n = 6)	3<sup>rd</sup> evaluation<br>(n = 5)
Anxiety self-control (1402)
Monitors the intensity of anxiety	4.67 (0.30)	4.50 (0.20)	4.99 (0.01)	0.069
Uses effective coping strategies	3.50 (0.73)	1.67 (0.45)	4.04 (0.47)	<strong>&lt; 0.001</strong>
Maintains social relationships	3.50 (0.56)	4.33 (0.30)	4.28 (0.49)	0.111
Monitors behavioral manifestations of anxiety	4.33 (0.45)	4.00 (0.57)	4.93 (0.06)	0.174
Fear level (1210)
Distress	1.17 (0.15)	2.00 (0.33)	2.12 (0.48)	<strong>&lt; 0.001</strong>
Restlessness	1.17 (0.15)	1.50 (0.31)	2.07 (0.49)	0.028
Difficulty concentrating	1.33 (0.30)	3.17 (0.49)	2.96 (0.74)	<strong>&lt; 0.001</strong>
Difficulty problem solving	3.17 (0.54)	4.17 (0.28)	3.73 (0.60)	0.103
Exaggerated concern about life events	1.17 (0.15)	1.33 (0.19)	2.01 (0.39)	0.040
Avoidance behavior	3.00 (0.57)	2.67 (0.69)	3.38 (0.61)	0.223
Anxiety level (1211)
Indecisiveness	1.33 (0.19)	1.33 (0.19)	2.66 (0.45)	0.004
Sleep disturbance	1.17 (0.15)	1.33 (0.19)	2.27 (0.65)	0.067
Decreased productivity	2.50 (0.45)	4.17 (0.43)	4.42 (0.16)	<strong>&lt; 0.001</strong>
Personal time management (1635)
Sets time for completion of commitments	2.17 (0.68)	1.83 (0.45)	3.16 (0.33)	0.019
Plans activities by the week	3.83 (0.59)	4.83 (0.15)	4.38 (0.21)	0.103
Minimizes interruptions	2.00 (0.57)	2.33 (0.65)	3.17 (0.66)	0.040
Uses strategies to reduce anxiety	2.67 (0.69)	3.17 (0.68)	3.91 (0.57)	0.336
